# Supplementary material
Source: PubMed Central journal article supplement (PMC4695633)
Supplement: me-15-1258.pdf [file me-15-1258.pdf]

| Diseases of Functions Annotation      | p-Value  | # of Molecules |
|---------------------------------------|----------|----------------|
| morphology of nervous system          | 1.75E-07 | 21             |
| abnormal morphology of microglia      | 1.75E-07 | 5              |
| abnormal morphology of nervous system | 1.78E-07 | 20             |

morphology of nervous system

| Gene           | Fold Change |
|----------------|-------------|
| <i>AGT</i>     | 5.07        |
| <i>RXRG</i>    | 4.84        |
| <i>MITF</i>    | 4.22        |
| <i>DCX</i>     | 3.68        |
| <i>MBP</i>     | 2.86        |
| <i>EYA1</i>    | 2.59        |
| <i>PLP1</i>    | 2.55        |
| <i>APOE</i>    | 2.55        |
| <i>GPR37L1</i> | 2.28        |
| <i>NFASC</i>   | 2.21        |
| <i>Cdkn1c</i>  | 1.76        |
| <i>Mt2</i>     | 1.71        |
| <i>SPARCL1</i> | 1.65        |
| <i>Mt1</i>     | 1.60        |
| <i>GM2A</i>    | 1.55        |
| <i>GAP43</i>   | -1.56       |
| <i>LDLR</i>    | -1.60       |
| <i>CADPS</i>   | -1.68       |
| <i>SPP1</i>    | -1.78       |
| <i>SULF1</i>   | -2.73       |
| <i>SYNE2</i>   | -3.36       |

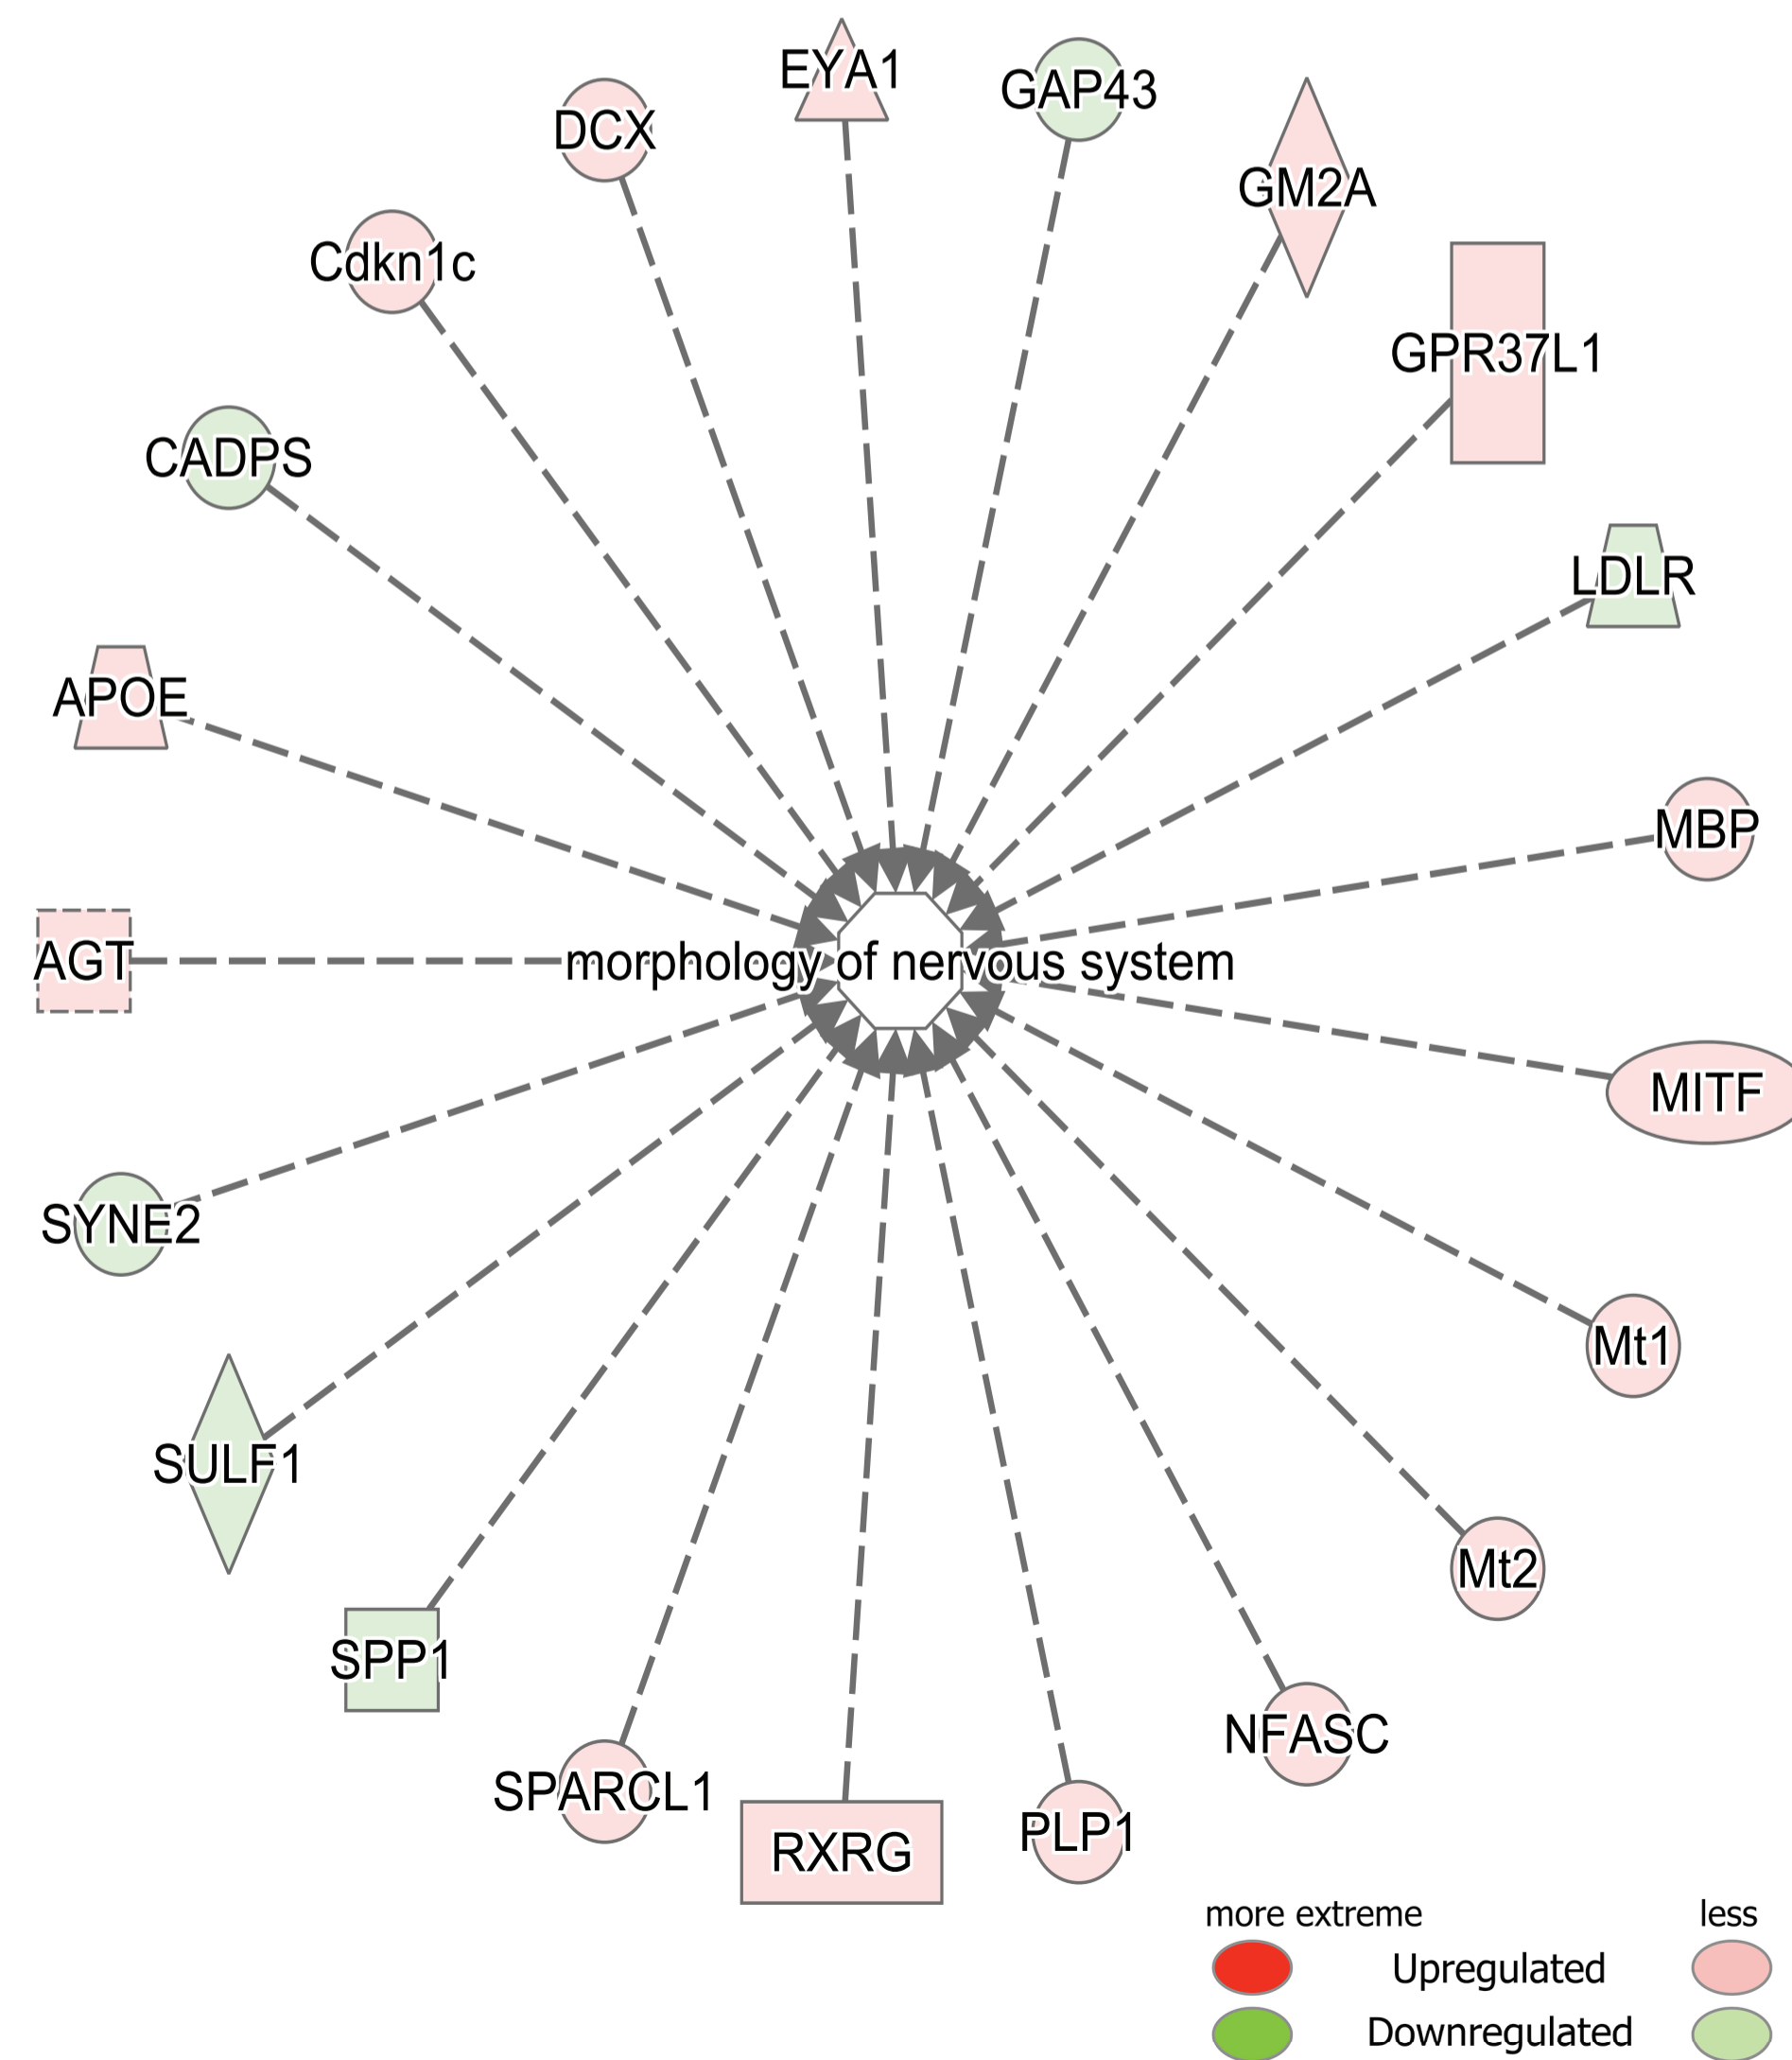

Network 1: Cell Death and Survival, Cellular Assembly and Organization, Cellular Compromise

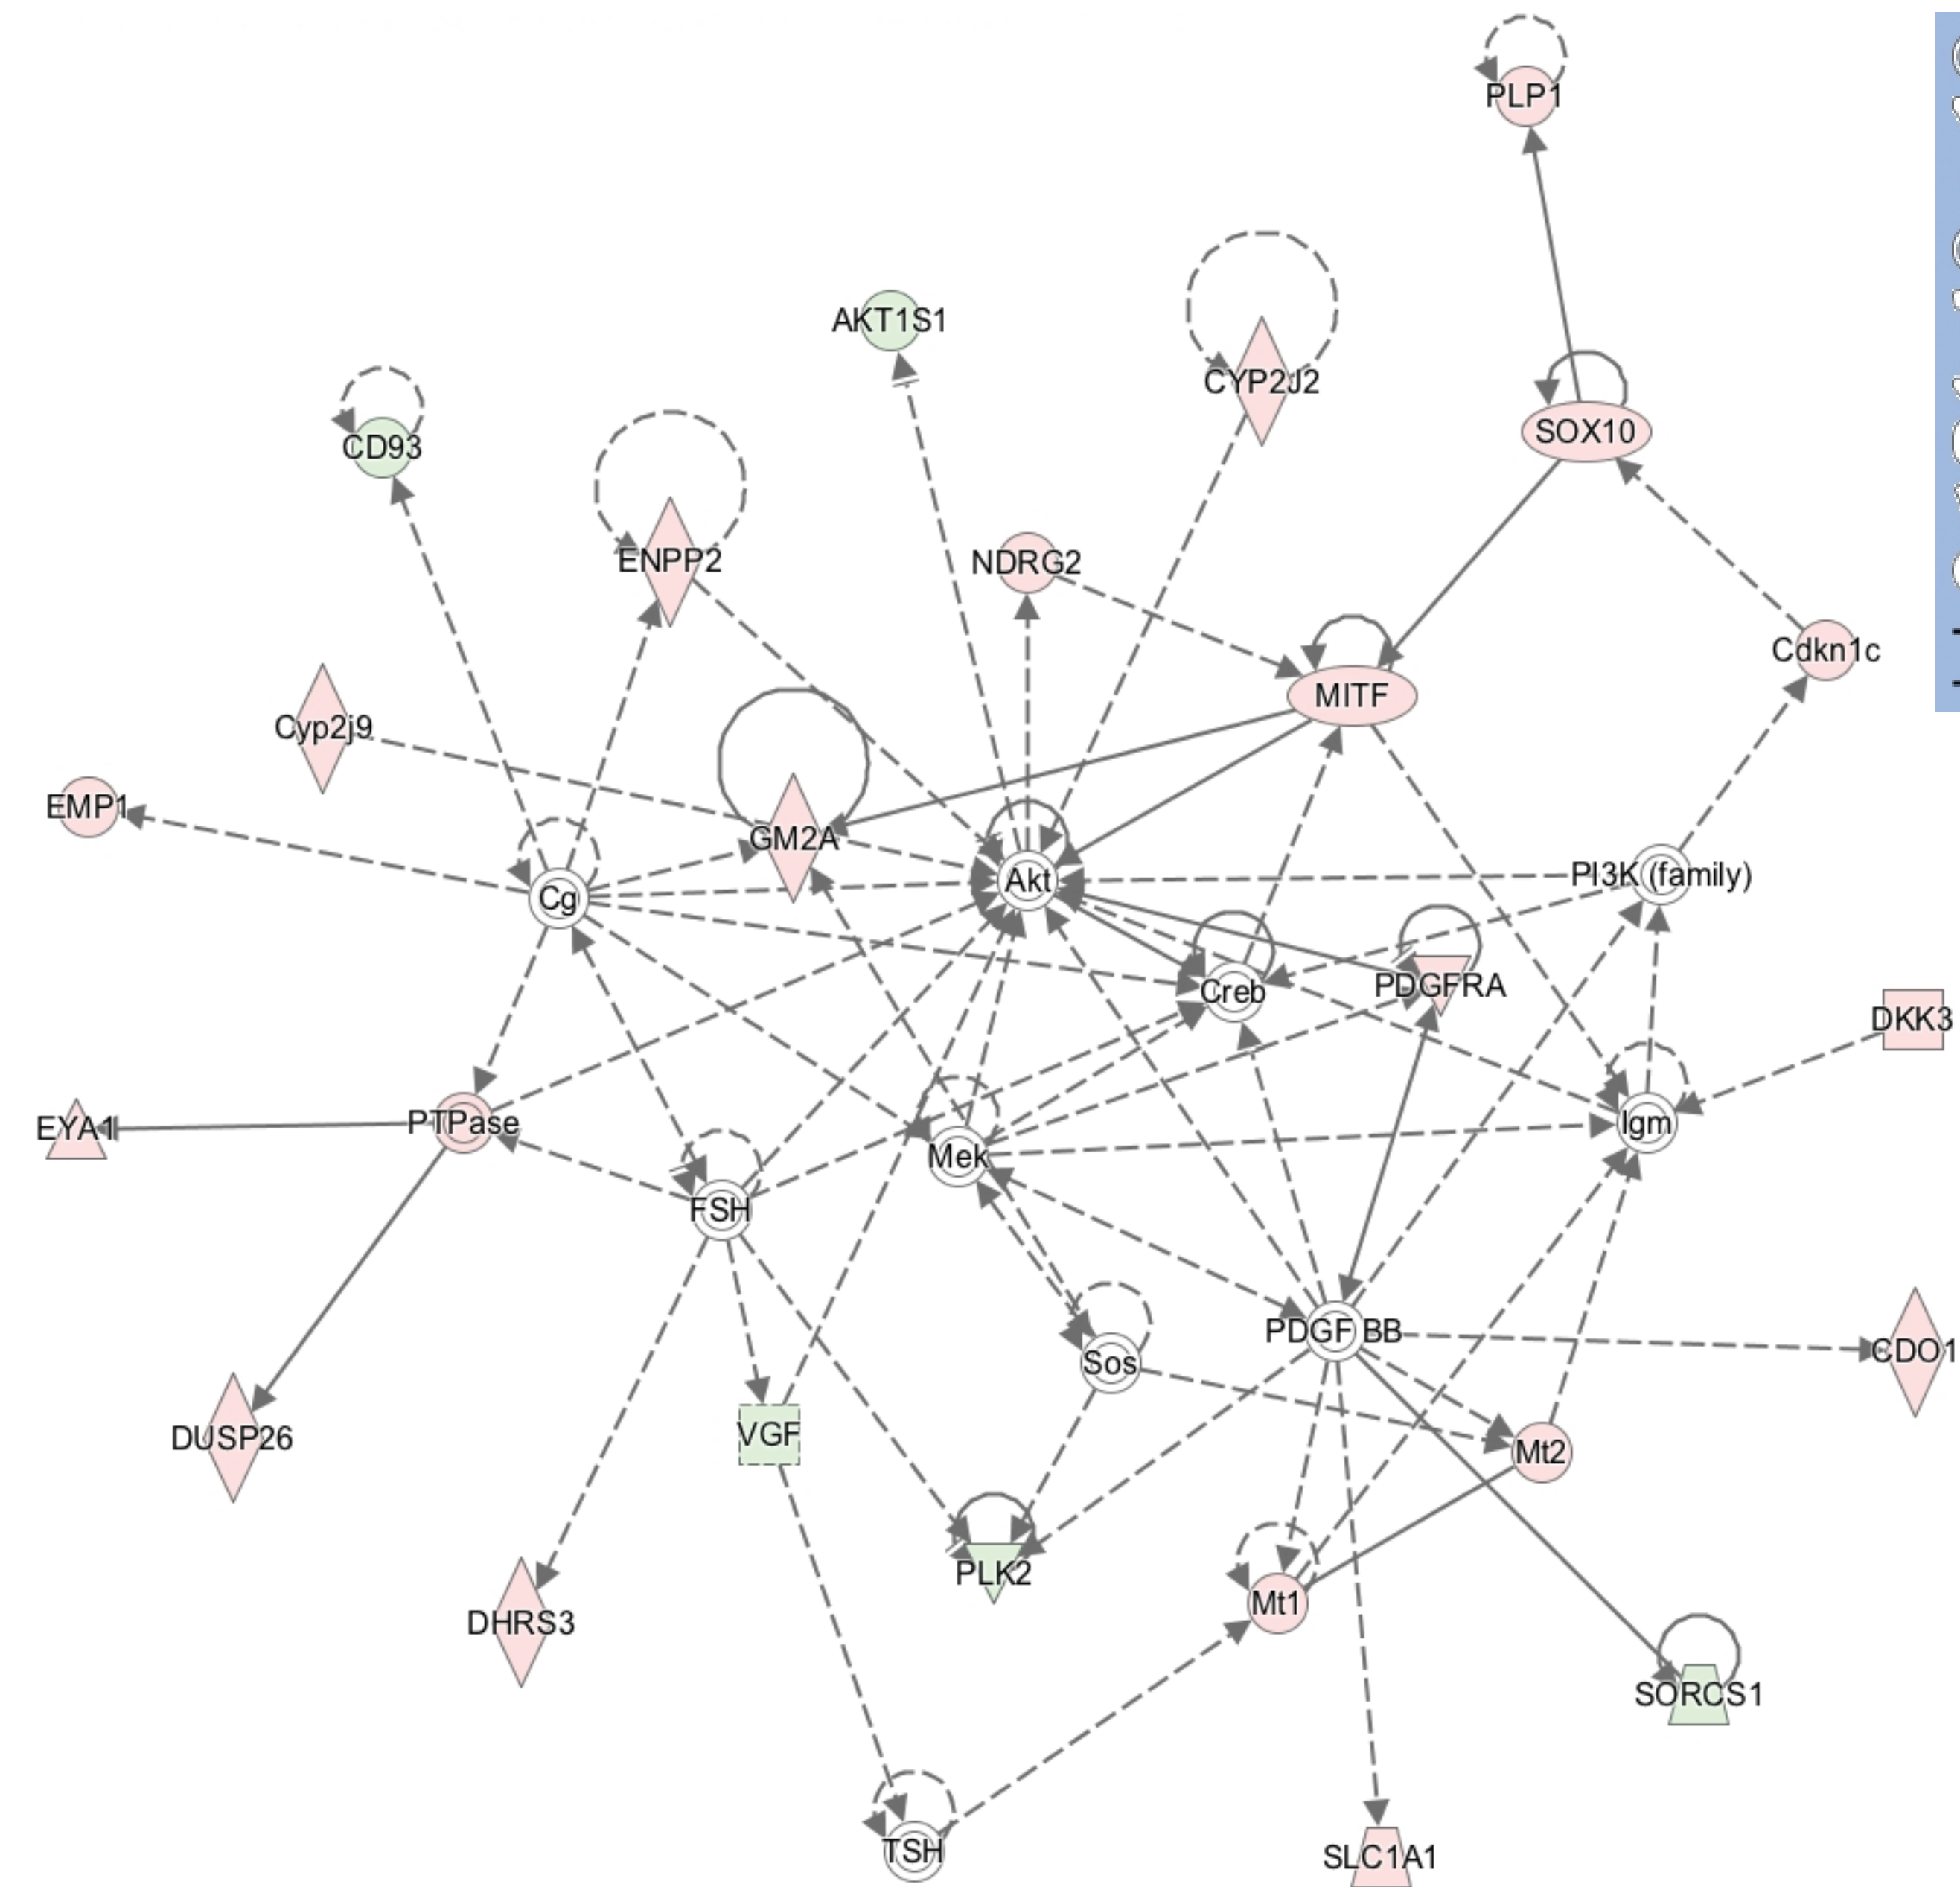

Network 2: Lipid Metabolism, Molecular Transport, Small Molecule Biochemistry

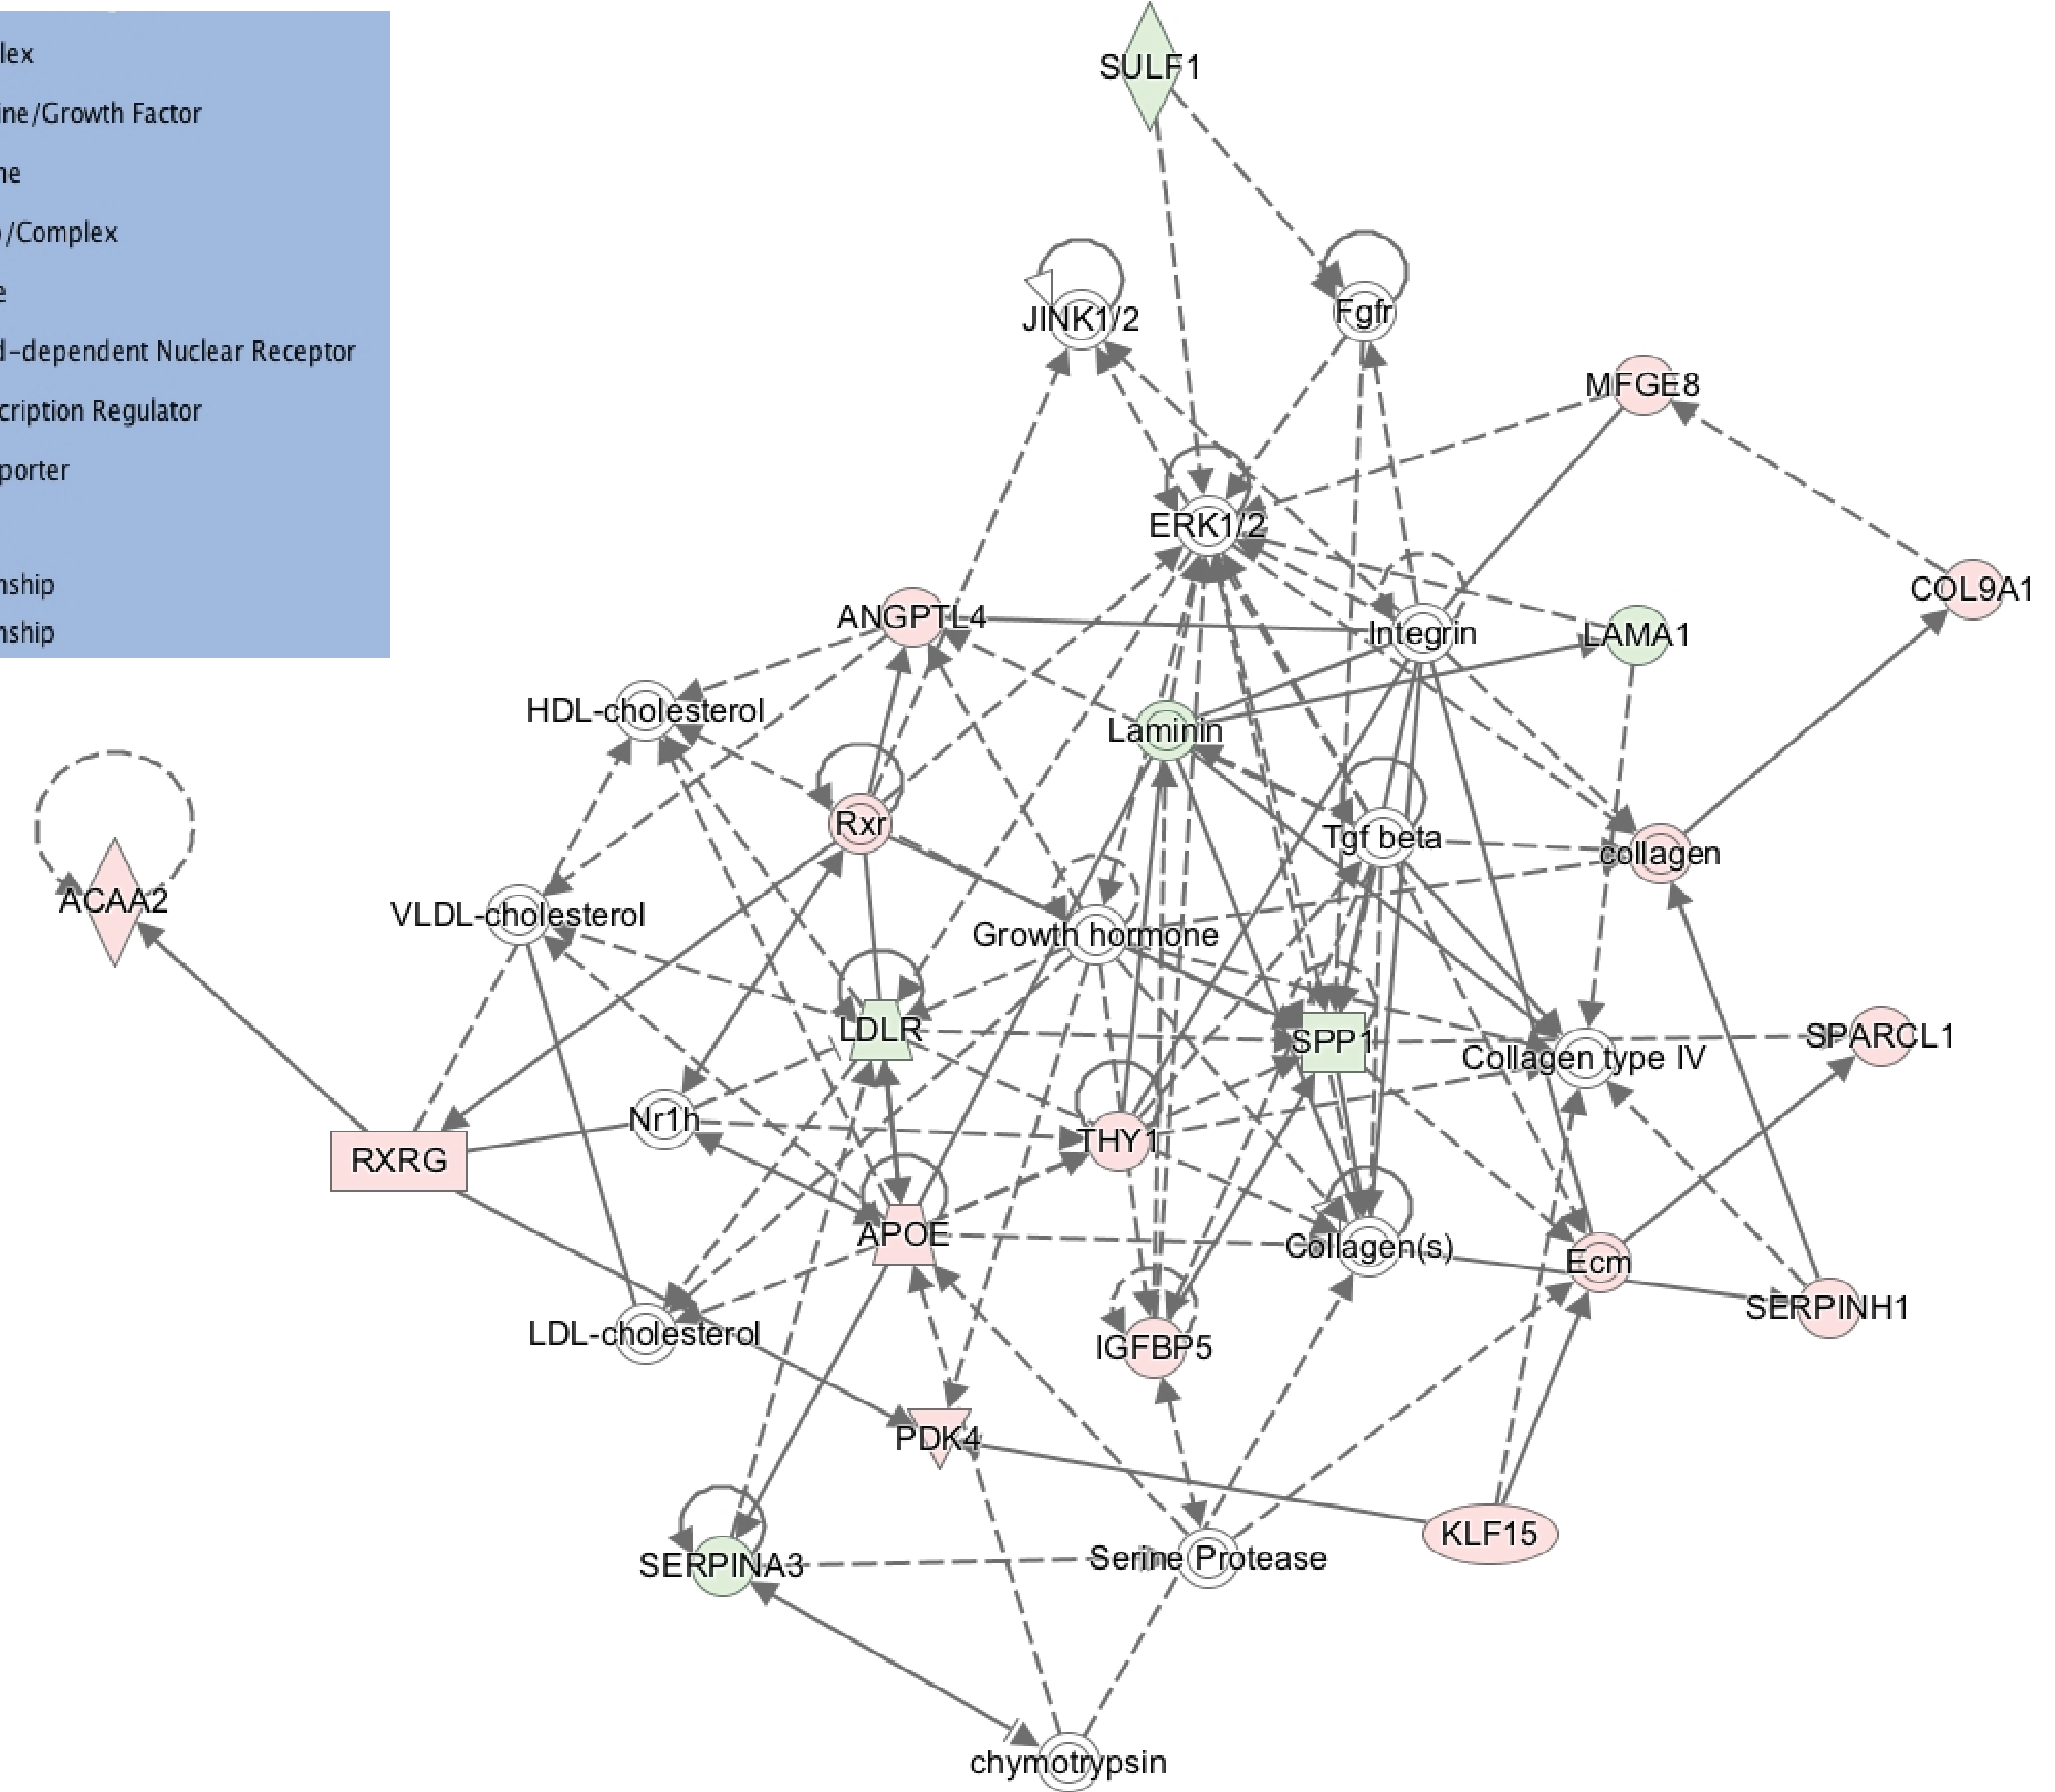

**Male Dex vs. EtOH**

**a.**

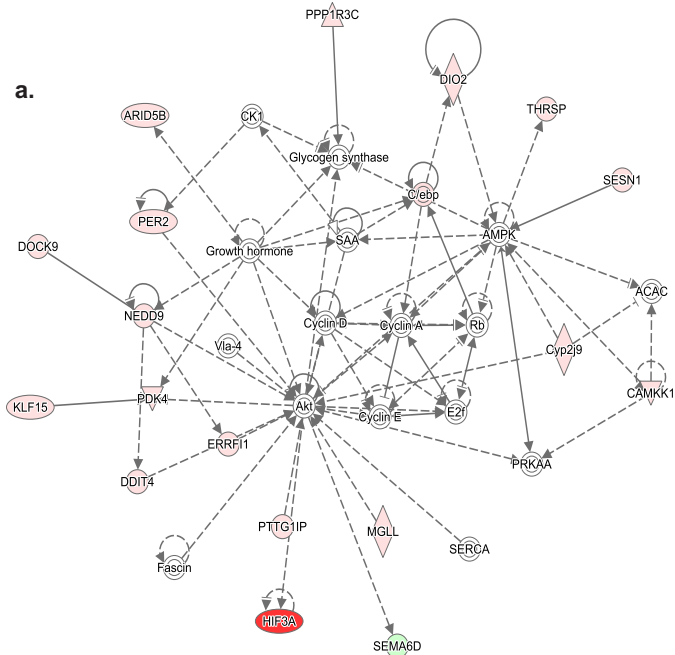

**Female Dex vs. EtOH**

**b.**

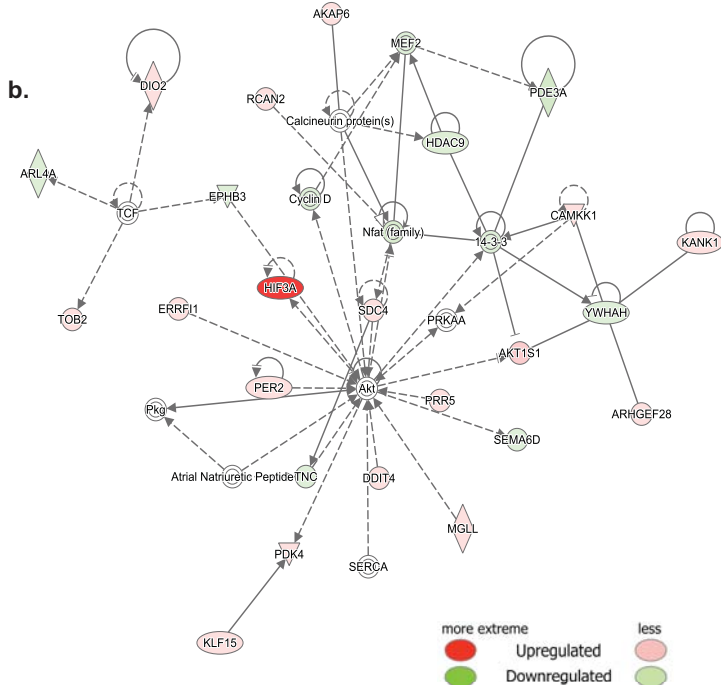

more extreme  
● Upregulated  
● Downregulated  
● less  
●

## gene expression (FPKM)

| > 100        | 100 < 10         | 10 < 1       | 1 < 0.1       |               | < 0.01       |
|--------------|------------------|--------------|---------------|---------------|--------------|
| <i>Ccnd1</i> | <i>Hlist3h2a</i> | <i>Sox1</i>  | <i>Dkk3</i>   | <i>Foxg1</i>  | <i>Lhx5</i>  |
| <i>Nes</i>   | <i>Wnt7b</i>     | <i>Rgs4</i>  | <i>Gad1</i>   | <i>Gpr50</i>  | <i>Lhx1</i>  |
| <i>Olig2</i> | <i>Hes1</i>      | <i>Irx1</i>  | <i>Pomc</i>   | <i>Dlx2</i>   | <i>Lhx8</i>  |
| <i>Sox2</i>  | <i>Ascl1</i>     | <i>Wnt7a</i> | <i>Arx</i>    | <i>Dlx1</i>   | <i>Sim1</i>  |
| <i>Ntrk2</i> | <i>Pvrl3</i>     | <i>Cxcr7</i> | <i>Nkx6-2</i> | <i>Gad2</i>   | <i>Mx1</i>   |
| <i>Ccna2</i> | <i>Rorb</i>      | <i>Id4</i>   | <i>Cartpt</i> | <i>Lhx9</i>   | <i>Nr5a1</i> |
|              | <i>Pou3f4</i>    | <i>Nr1d1</i> | <i>Cbln1</i>  | <i>Barhl1</i> | <i>Dlx5</i>  |
|              | <i>Shcbp1</i>    | <i>Irx5</i>  | <i>Gsx1</i>   | <i>Lmx1b</i>  | <i>Hcrt</i>  |
|              | <i>Igfbp5</i>    | <i>Rora</i>  | <i>Nrg1</i>   | <i>Nkx2-1</i> | <i>Lhx6</i>  |
|              | <i>Arnt2</i>     | <i>Foxb1</i> | <i>Lef1</i>   | <i>Foxa2</i>  | <i>Nhlh2</i> |
|              | <i>Fstl1</i>     | <i>Fzd2</i>  | <i>Foxa1</i>  | <i>Fgf15</i>  | <i>Otp</i>   |
|              | <i>Pax6</i>      | <i>Scg2</i>  | <i>Npy</i>    | <i>Dbx1</i>   | <i>Rax</i>   |
|              | <i>Nkx2-2</i>    | <i>Rarb</i>  | <i>Gsx2</i>   | <i>Fezf2</i>  | <i>Uncx</i>  |
|              | <i>Cited1</i>    | <i>Lhx2</i>  | <i>Pax7</i>   | <i>Trh</i>    | <i>Wnt8b</i> |
|              | <i>Pou3f2</i>    | <i>Foxd1</i> | <i>Gal</i>    | <i>Shh</i>    |              |
|              | <i>Otx2</i>      | <i>Fst</i>   | <i>Sim2</i>   | <i>Gdf10</i>  |              |
|              |                  | <i>Irx3</i>  |               |               |              |
|              |                  | <i>Agrp</i>  |               |               |              |
